# Supplementary material for: Use of cosmic-ray neutron sensors for soil moisture monitoring in forests
Source: Copernicus journal article supplement (doi:10.5194/hess-20-1269-2016), 2016-03-30
Supplement: Supplementary file 1 [file hess-20-1269-2016-supplement.zip]

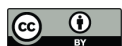

## *Supplement of*

# **Use of cosmic-ray neutron sensors for soil moisture monitoring in forests**

**Ingo Heidbüchel et al.**

*Correspondence to:* Ingo Heidbüchel ([ingo.heidbuechel@gfz-potsdam.de](mailto:ingo.heidbuechel@gfz-potsdam.de))

- [hess-20-1269-2016-supplement-title-page.pdf](#)
- [SuppFigures.pdf](#)
- [Supplement.xlsx](#)

The copyright of individual parts of the supplement might differ from the CC-BY 3.0 licence.
