# Supplementary material for: Use of cosmic-ray neutron sensors for soil moisture monitoring in forests
Source: Copernicus journal article supplement (doi:10.5194/hess-20-1269-2016), 2016-03-30
Supplement: Supplementary file 2 [file hess-20-1269-2016-supplement.zip]

Archive with 3 entries (3 files):
- SuppFigures.pdf
- Supplement.xlsx
- hess-20-1269-2016-supplement-title-page.pdf
