# Supplementary material for: Use of cosmic-ray neutron sensors for soil moisture monitoring in forests
Source: Copernicus journal article supplement (doi:10.5194/hess-20-1269-2016), 2016-03-30
Supplement: Supplementary file 2 [file hess-20-1269-2016-supplement.zip › SuppFigures.pdf]

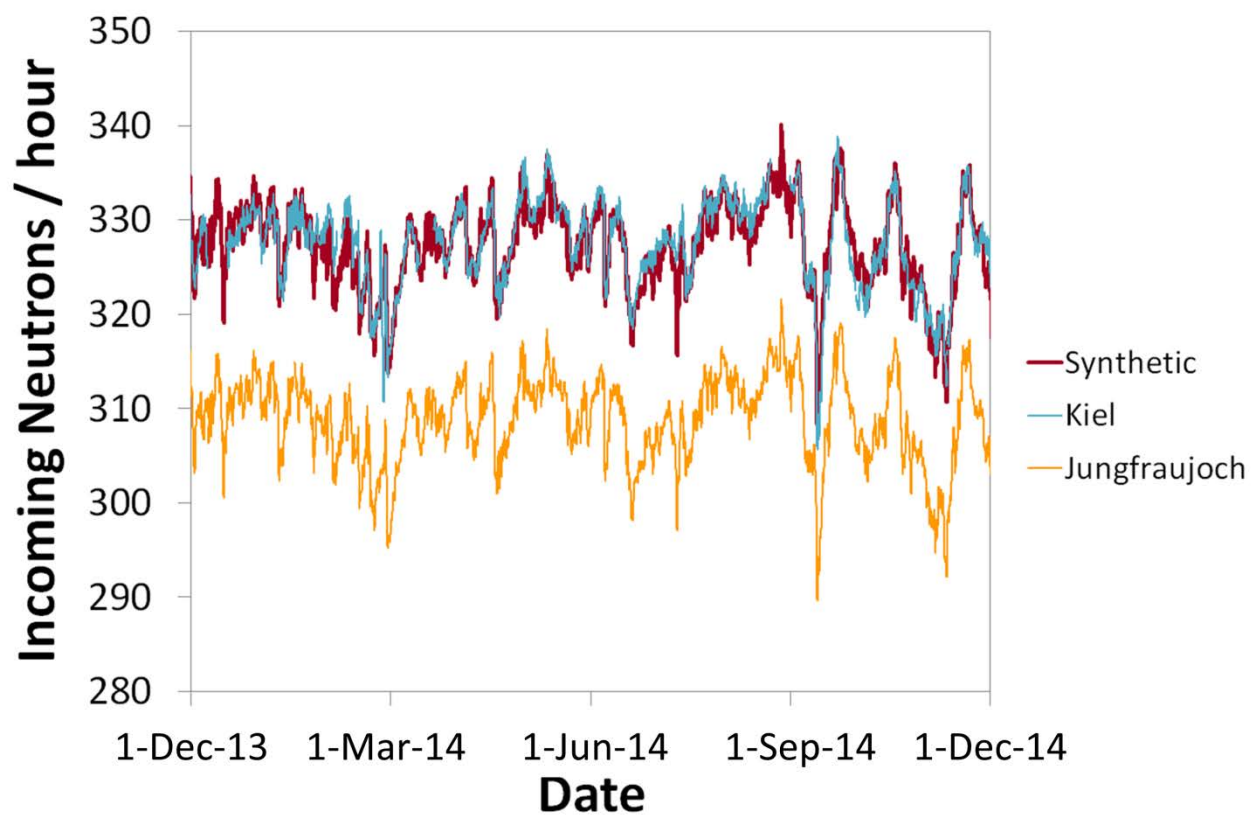

1  
2 Figure S1. Incoming neutron flux from the neutron monitors in Kiel, Germany and Jungfraujoch,  
3 Switzerland and synthetic continuous time series of incoming neutron flux combined from these  
4 two and used for the corrections in this study.

5

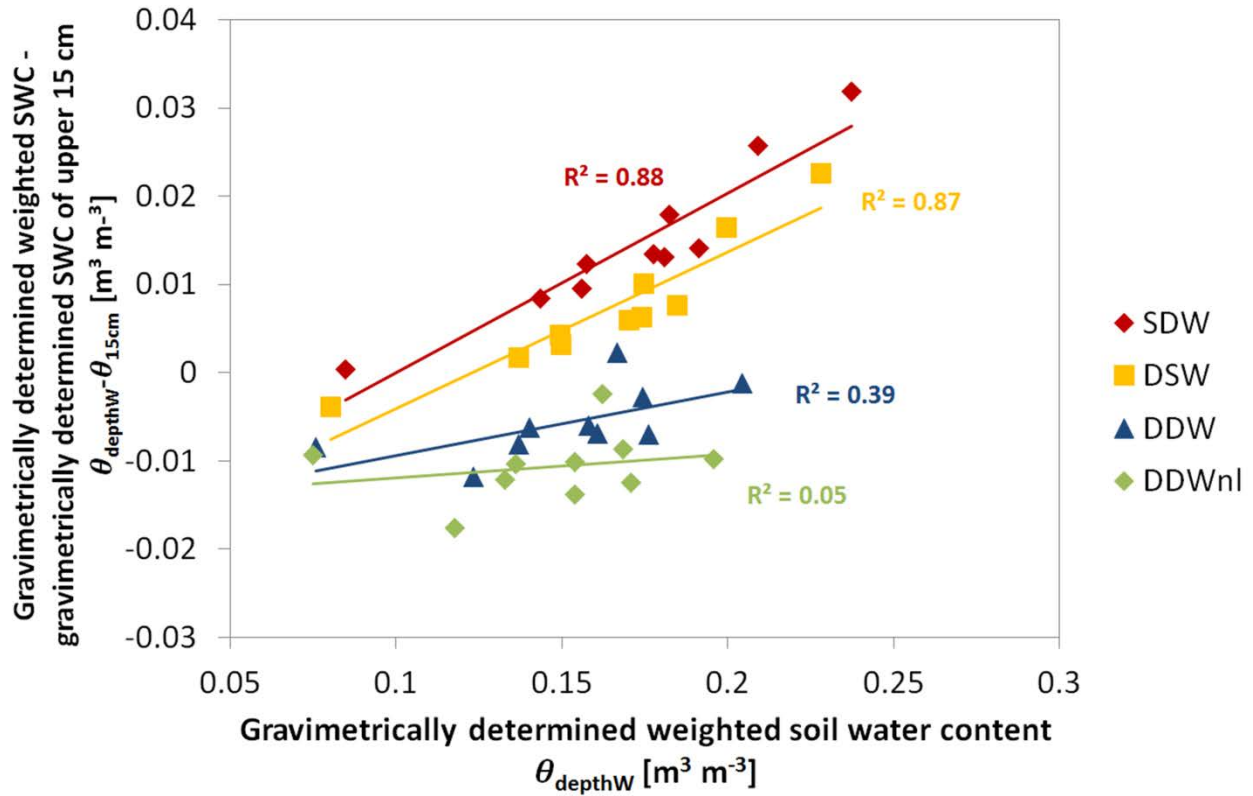

6

7 Figure S2. Comparison of depth-(and distance-) weighted averages of gravimetrically determined  
 8 soil water content with unweighted gravimetrically determined soil water content of the upper 15  
 9 cm of the soil. The first two weighting approaches overestimate soil water content in the upper 15  
 10 cm especially at high soil water contents. The last two approaches have only a slight negative  
 11 offset and no significant relationship with wetness conditions.
